# Supplementary figures and images for: Neospora caninum: a new class of biopharmaceuticals in the therapeutic arsenal against cancer
Source: HighWire-hosted journal article supplement (doi:10.1136/jitc-2020-001242), 2020-11-01

## Supplementary Figure 2

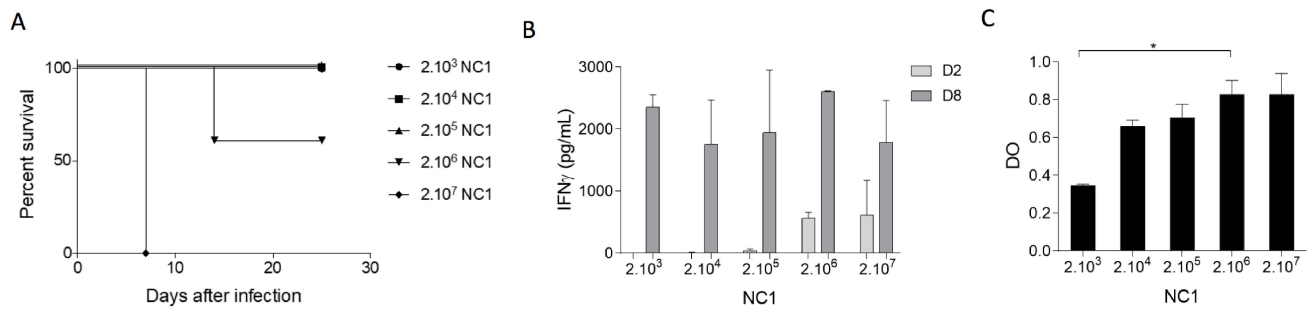

Supplement: jitc-2020-001242supp002_data_supplement.pdf [file jitc-2020-001242supp002_data_supplement.pdf]

## Supplementary Figure 3

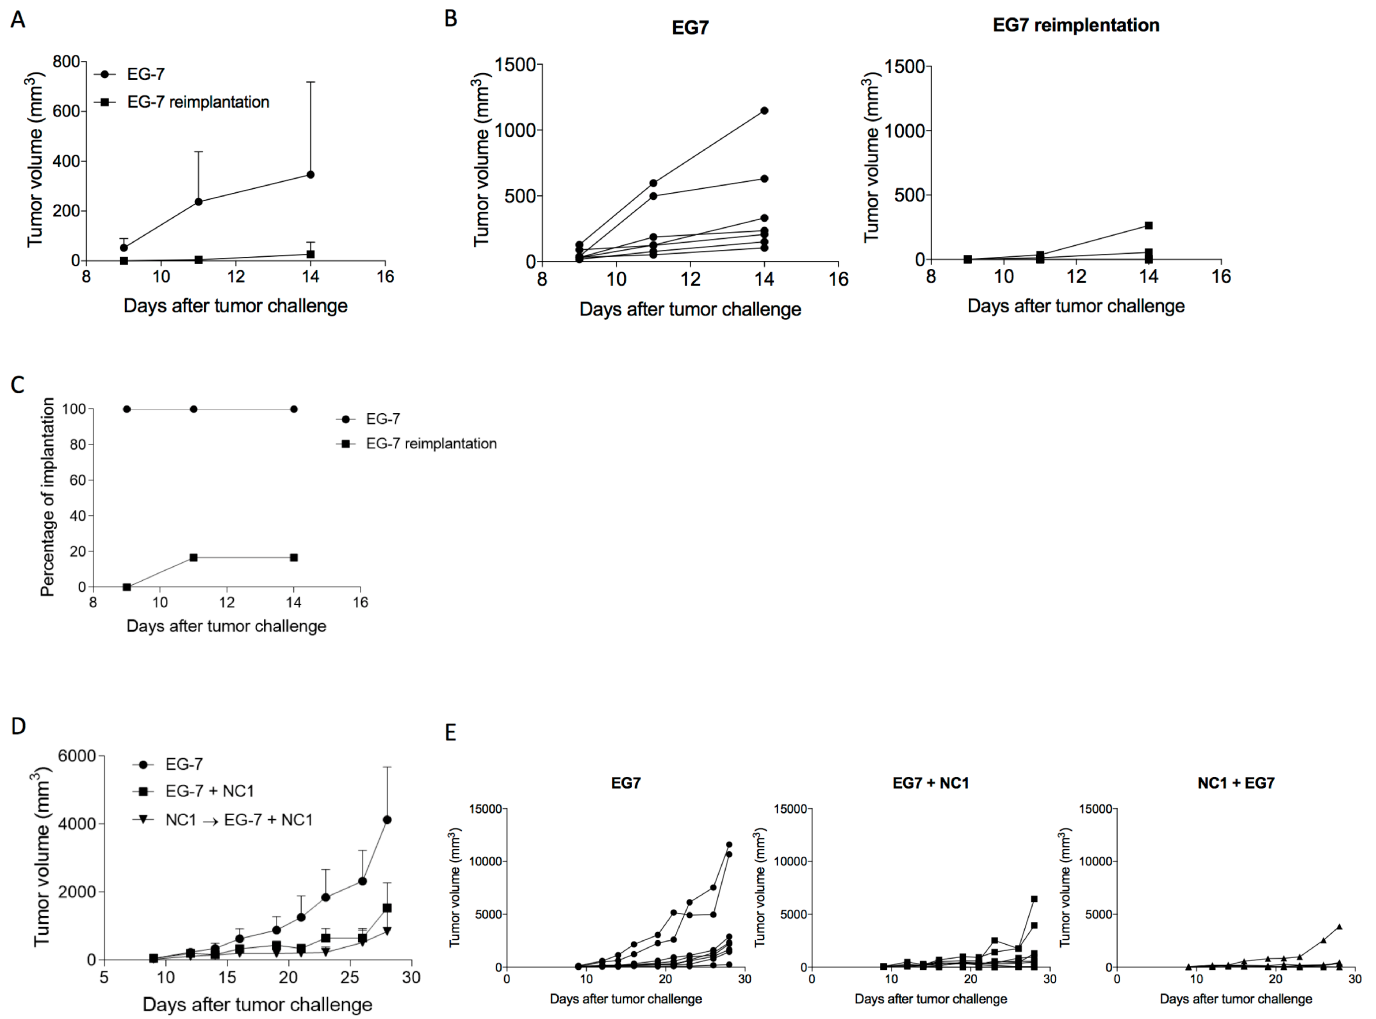

Supplement: jitc-2020-001242supp003_data_supplement.pdf [file jitc-2020-001242supp003_data_supplement.pdf]

## Supplementary Figure 5

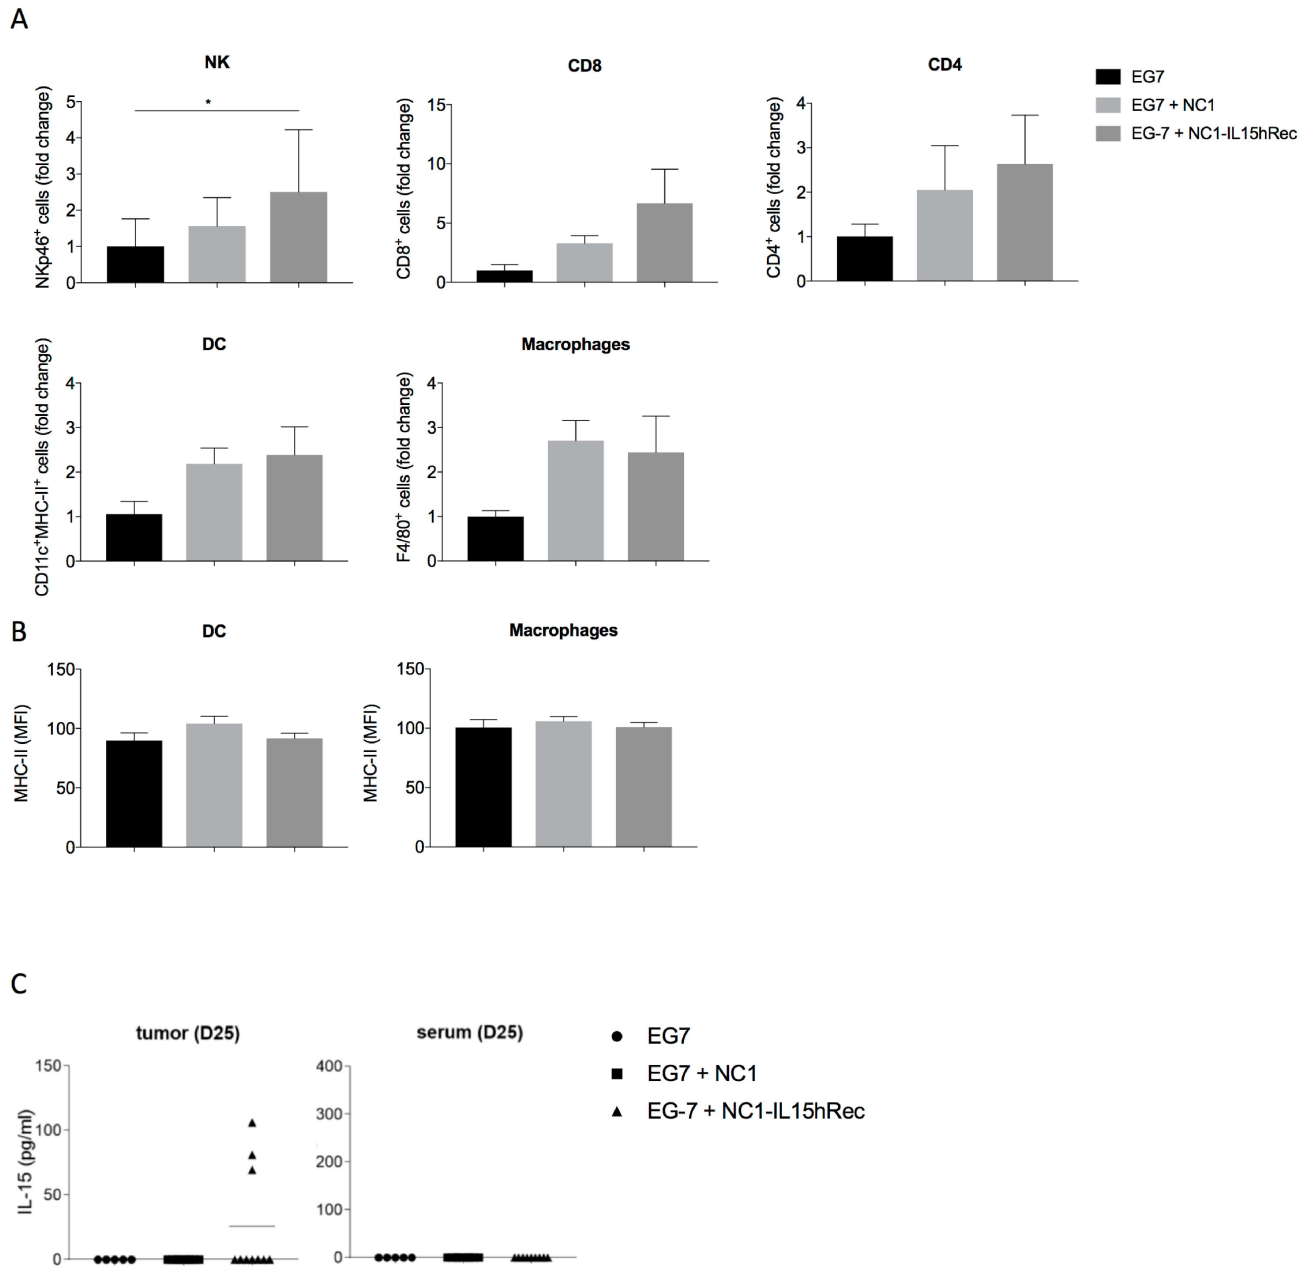

Supplement: jitc-2020-001242supp005_data_supplement.pdf [file jitc-2020-001242supp005_data_supplement.pdf]

## Supplementary Figure 6

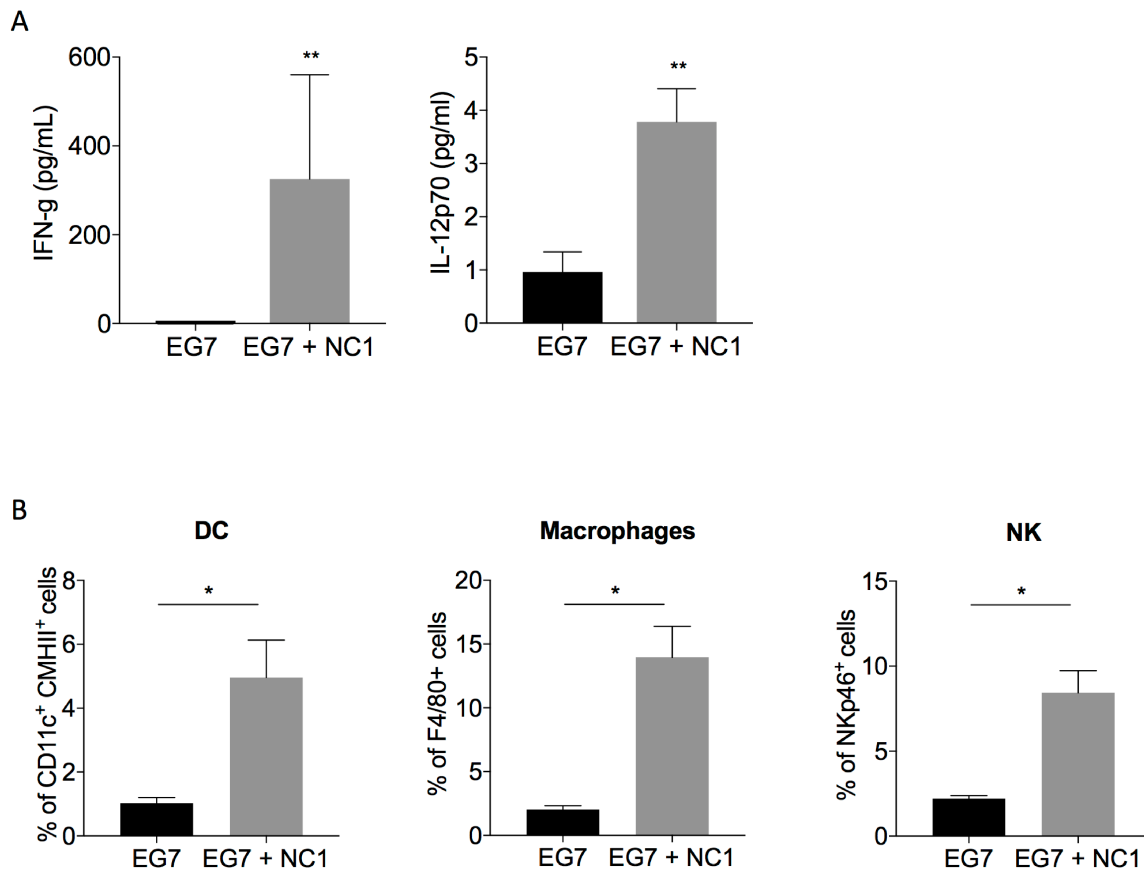

Supplement: jitc-2020-001242supp006_data_supplement.pdf [file jitc-2020-001242supp006_data_supplement.pdf]
